# Supplementary material
Source: publisher figshare collection journal article supplement (https://tandf.figshare.com/ndownloader/files/24696749)
Supplement: Supplementary file 1 [file 24696749]

**Annex 1 – Survey Paper Version**

|  | FOR BALKANS | | | | | | |
| --- | --- | --- | --- | --- | --- | --- | --- |
| Stakeholder Survey - Forests and Rivers Perceptions, to build a Decision Support System for Sustainable Management in some study areas in the Balkans.  All collected information would be processed anonymously and aggregated, and they would be used only for scientific purposes of this project.  THANK YOU FOR YOUR IMPORTANT CONTRIBUTION!  FOR BALKANS is a partnership between ATB , F360 and DICAM, funded by Trento Autonomous Province (IT) | | | | | | | |
|
| **STUDY AREA: xxxx** | | | | | | | |
| **Section 1: Stakeholder ID** | | |  |  |  |  |  |
| **1.1** | ID UNIQUE VALUE (CAddmm##): |  | | | | | |
| **1.2** | Date (dd/mm/yyyy): |  | | | | | |
| **1.3** | Your Company/Association name: |  | | | | | |
| **1.4** | City (registered office) |  | | | | | |
| **1.5** | Your Background studies |  | | | | | |
| **1.6** | How long are you working in the company? | | | | | | |
|  | Less than 1 year |  |  |  |  |  |  |
|  | Between 1 and 5 years |  |  |  |  |  |  |
|  | Between 5 and 10 years |  |  |  |  |  |  |
|  | More than 10 years |  |  |  |  |  |  |
| **1.7** | How long are you living in this area? | | | | | | |
|  | Less than 1 year |  |  |  |  |  |  |
|  | Between 1 and 5 years |  |  |  |  |  |  |
|  | Between 5 and 10 years |  |  |  |  |  |  |
|  | More than 10 years |  |  |  |  |  |  |
| **1.8** | How long your reality is working in the valley? | | | | | | |
|  | < 5 years |  |  |  |  |  |  |
|  | 5 - 10 years |  |  |  |  |  |  |
|  | 10 - 15 years |  |  |  |  |  |  |
|  | 15 - 20 years |  |  |  |  |  |  |
|  | > 20 years |  |  |  |  |  |  |
| **1.9** | Describe in the specific your activity in the valley (in the past and in the present) [max 300 words] | | | | | | |
|  | | | | | | | |
|  | | | | | | | |
|  | | | | | | | |
| **1.10** | Have you already participated to a Forest/River Survey? | | | | | | |
|  | yes |  |  |  |  |  |  |
|  | no |  |  |  |  |  |  |
|  | I don't know |  |  |  |  |  |  |
|  |  |  |  |  |  |  |  |
| **Section 2: FOREST MANAGEMENT Preferences.** | | | | | | | |
| **2** | Please select your preferences regarding FOREST MANAGEMENT | | | | | | |
| **2.1** | LANDSCAPE | | | | | | |
| | 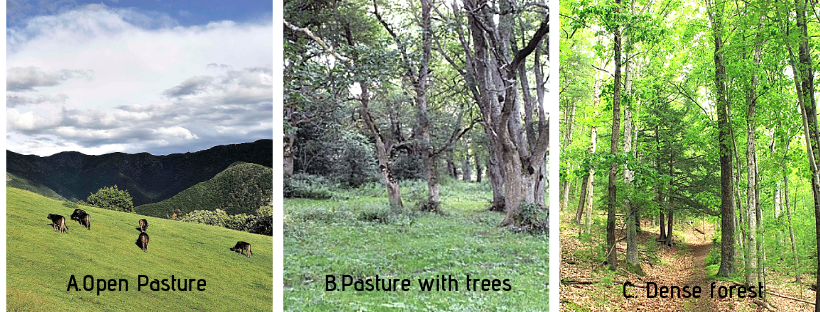 | | --- | | | | | | | | |
|  | A. Open Pasture |  |  |  |  |  |  |
|  | B. Pasture with trees |  |  |  |  |  |  |
|  | C. Dense forest |  |  |  |  |  |  |
| **2.2** | **FOREST TYPES** | | | | | | |
| | 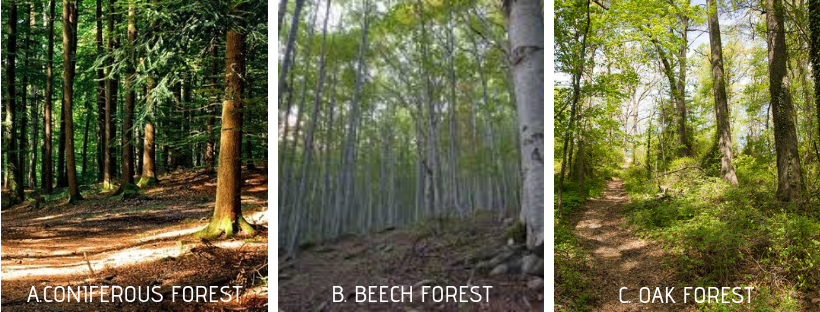 | | --- | | | | | | | | |
|  | A. Coniferous Forest |  |  |  |  |  |  |
|  | B. Beech Forest |  |  |  |  |  |  |
|  | C. Oak Forest |  |  |  |  |  |  |
| **2.3** | **FOREST MANAGEMENT** | | | | | | |
| | 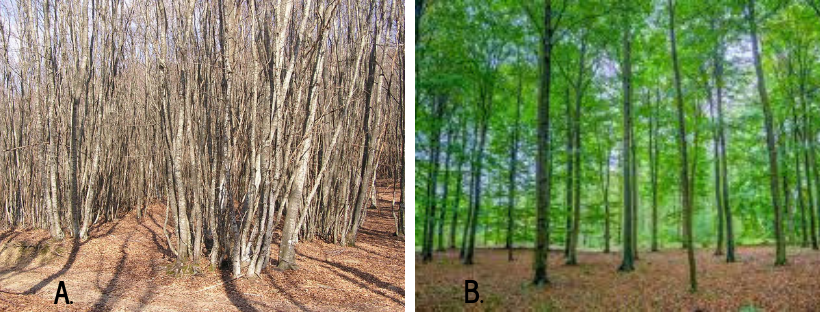 | | --- | | | | | | | | |
|  | A. Coppice |  |  |  |  |  |  |
|  | B. High Forest |  |  |  |  |  |  |
| **2.4** | **SPATIAL TREE DISTRIBUTION** | | | | | | |
| | 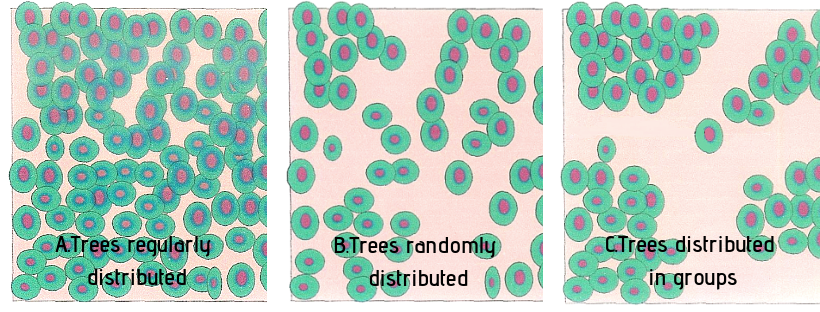 | | --- | | | | | | | | |
|  | A. Trees regularly distributed |  |  |  |  |  |  |
|  | B. Trees randomly distributed |  |  |  |  |  |  |
|  | C. Trees distributed in groups |  |  |  |  |  |  |
| **2.5** | **VERTICAL TREE DISTRIBUTION** | | | | | | |
| | 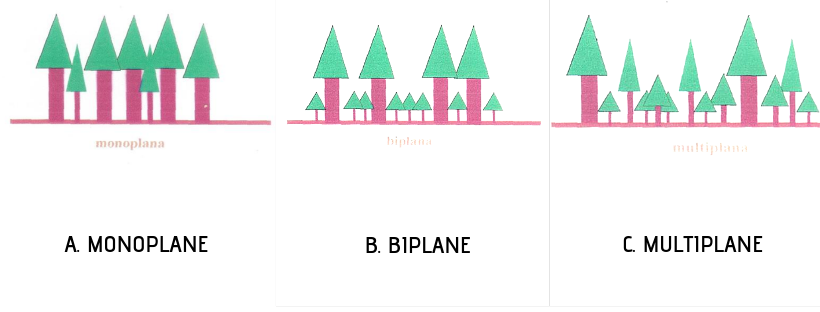 | | --- | | | | | | | | |
|  | A. Monoplane |  |  |  |  |  |  |
|  | B. Biplane |  |  |  |  |  |  |
|  | C. Multiplane |  |  |  |  |  |  |
|  |  |  |  |  |  |  |  |
| **Section 3: Forest functions in the Valley: please select and compare the most important ones** | | | | | | | |
| **3.1** | **Which is the most important PROVISIONING function provided by forest and river in the Valley?** | | | | | | |
|  | Fuelwood | **P1** |  |  |  |  |  |
|  | Wood for manufacturing | **P2** |  |  |  |  |  |
|  | Water and fish | **P3** |  |  |  |  |  |
|  | Non wood forest products | **P4** |  |  |  |  |  |
| **3.2** | **Which is the most important REGULATING function provided by forest and river in the Valley?** | | | | | | |
|  | Water flow regulation | **R1** |  |  |  |  |  |
|  | Erosion and Landslides Protection | **R2** |  |  |  |  |  |
|  | Climate Change Mitigation | **R3** |  |  |  |  |  |
|  | Bioremediation | **R4** |  |  |  |  |  |
| **3.3** | **Which is the most important SUPPORTING function provided by forest and river in the Valley?** | | | | | | |
|  | Lifecycle maintenance | **S1** |  |  |  |  |  |
|  | Maintenance of nursery population | **S2** |  |  |  |  |  |
|  | Habitat Protection | **S3** |  |  |  |  |  |
|  | Disease Control | **S4** |  |  |  |  |  |
| **3.4** | **Which is the most important CULTURAL function provided by forest and river in the Valley?** | | | | | | |
|  | Tourism and outdoor activities | **C1** |  |  |  |  |  |
|  | Historical and cultural Heritage | **C2** |  |  |  |  |  |
|  | Landscape Aesthetic | **C3** |  |  |  |  |  |
|  | Spiritual Value | **C4** |  |  |  |  |  |
| **3.5** | **Considering the function chosen in the previous question, can you compare them in terms of importance?** | | | | | | |
|  |  |  | P__ | R__ | S__ |  |  |
|  | Provisioning P__ |  |  |  |  | M =more important than |  |
|  | Regulating R__ |  |  |  |  | A = as important as |  |
|  | Supporting S__ |  |  |  |  | L = less important than |  |
|  | Cultural C__ |  |  |  |  |  |  |
|  |  |  |  |  |  |  |  |
| **Section 4: Management Practices: Please choose and compare the most important ones for the Valley** | | | | | | | |
| **4.1** | **Management Practices: Which could be enhanced in the valley in order to support the functions you selected? (4 choices)** | | | | | | |
| **P1** | Enhancing wood residues (woodchips) for the bioenergy production | | | | | | |
| **P2** | Do not remove dead wood on the ground and dead plants of large dimensions (diameter minimum 30 cm) | | | | | | |
| **P3** | Promoting mixed forests rather than pure conifer or broadleaved forests through silvicultural interventions | | | | | | |
| **P4** | Improving recreational attractiveness through cleaning of path network in the forests, set up refreshment and picnic areas, developing environmental education trails | | | | | | |
| **P5** | Monitoring river and forest ecosystem quality | | | | | | |
| **P6** | Changing forest governance though transformation from coppices to high forests | | | | | | |
| **P7** | Implementing phytosanitary cuttings | | | | | | |
| **P8** | Thinning in forests and rivers to promote the active management | | | | | | |
| **P9** | Monitoring and cleaning of riverbeds from excessive vegetation and sediments | | | | | | |
| **4.2** | **Considering the PRACTICES chosen in the previous question, can you compare them in terms of importance?** | | | | | | |
|  |  |  | P__ | P__ | P__ |  |  |
| **P__** | _______________________________________ | P__ |  |  |  | M =more important than |  |
| **P__** | _______________________________________ | P__ |  |  |  | A = as important as |  |
| **P__** | _______________________________________ | P__ |  |  |  | L = less important than |  |
| **P__** | _______________________________________ | P__ |  |  |  |  |  |
|  |  |  |  |  |  |  |  |
| **THANK YOU FOR YOUR IMPORTANT CONTRIBUTION!** | | | | | | | |
